# Supplementary material for: Sleep Architecture When Sleeping at an Unusual Circadian Time and Associations with Insulin Sensitivity
Source: PubMed Central journal article supplement (PMC3738551; doi:10.1371/journal.pone.0072877), 2013-08-08
Supplement: pone.0072877.s001.pdf [file pone.0072877.s001.pdf]

5

*- Research proposal -*

10 *F Rutters, H Gonnissen, R Hursel, MS Westerterp-Plantenga*

**April 2010**

15

20

25

30

35 **Protocol title**

Effects of circadian misalignment and sleep disturbance on feeding patterns, obesity and the metabolic syndrome

40 **Protocol ID** NL 31568**Short title** Effects of circadian misalignment**Version** Second**Date** 12/04/2010**Coordinating investigator** Prof. M.S. Westerterp-Plantenga; Maastricht45 University; [m.westerterp@hb.unimaas.nl](mailto:m.westerterp@hb.unimaas.nl); 043-3881566**Principle investigator** dr. F. Rutters; Maastricht University;[f.rutters@hb.unimaas.nl](mailto:f.rutters@hb.unimaas.nl); 043-3882123**Sponsor** none**Independent physician** dr. H. Kuipers; MUMC+; 043-388149350 **Laboratory sites** Maastricht University**Protocol Signature Sheet**55 **Head of department** Prof. R. Mensink**Coordinating investigator** Prof. M.S. Westerterp-Plantenga

**Table of contents**

|    |                                                     |    |
|----|-----------------------------------------------------|----|
|    | Protocol title .....                                | 2  |
| 60 | List of abbreviations and relevant definitions..... | 4  |
|    | Summary .....                                       | 5  |
|    | 1. Introduction and rationale.....                  | 7  |
|    | 2. Primary objectives .....                         | 10 |
|    | 3. Study design .....                               | 11 |
| 65 | 4. Study population .....                           | 13 |
|    | 5. Treatment of subjects .....                      | 15 |
|    | 7. Methods .....                                    | 16 |
|    | 8. Safety reporting .....                           | 26 |
|    | 9. Statistical analysis.....                        | 28 |
| 70 | 10. Ethical considerations .....                    | 29 |
|    | 11. Administrative aspects and publication.....     | 32 |
|    | 12. References.....                                 | 34 |

**List of abbreviations and relevant definitions**

- BMI: Body Mass Index
- 75 SCN: suprachiasmatic nucleus (brain structure)
- AEE: activity induced energy expenditure
- EEG: electroencephalogram
- ECG: Electrocardiography
- EMG: Electromyography
- 80 EOG: Electrooculography
- REM: Rapid eye movement sleep
- VAS: visual analogue scales
- POMS: Profile of Mood States
- STAI-state: State Trait Anxiety Index
- 85 TFEQ: Three Factor Eating Questionnaire
- TEE: total energy expenditure
- SMR: sleeping metabolic rate
- DEE: diet-induced energy expenditure
- RQ: respiratory quotient
- 90 RMR: Resting Metabolic Rate (consisting of SMR and DEE)
- PAL: Physical Activity Level
- BMR: Basal Metabolic Rate

95

### **Summary**

**Rationale:** The prevalence of obesity has increased worldwide to epidemic proportions. Until now, recommendations for improving food choice, food intake patterns, and energy intake, as well as for normalizing physical activity, have not  
100 resulted in solutions for prevention and treatment of obesity. It may be that advices on the energy balance components energy intake and energy expenditure lack the interaction with the subjects' individual circadian alignment, or that circadian alignment is disturbed, due to environmental pressure.

**Objective:** To determine the consequences of circadian misalignment for energy  
105 intake and energy expenditure, as well as sleep quality, mood, feelings of hunger and satiety, food choice, and the reward system.

**Study design:** Subjects will stay time blinded in the respiration chamber to measure energy intake and energy expenditure, as well as sleep quality, mood, feelings of hunger and satiety, food choice, and the reward system. During their stay in the  
110 chamber, subjects will be fed in energy balance in a food-entrained way, at time-points related to their cycle duration. EEG will be used to measure wake and sleep phases continuously, in order to determine sleep quality and sleep time. Heart rate will be monitored using a ECG and body temperature using a CorTemp™ Data Recorder. Appetite and mood profiles will be measured hourly and before and after  
115 each meal, by anchored 100 mm visual analogue scales and by POMS and STAI-state questionnaires. Also, blood-parameters will be measured before and after a meal. Finally, effects on food reward and energy intake will be measured by means of a validated wanting and liking computer-test, before and during the evening meal before subjects leave the chamber. This evening meal consists of subjects' food  
120 choice, and will be given *ad libitum*. Food choice, rewarding characteristics, macronutrient composition, energy-density, and energy content will be calculated.

**Study population:** 16 male subjects in good health, weight stable, non-smokers, not using medication, not having any sleep problems, and at most moderate alcohol users. They have to be overweight, BMI 25-29 kg/m<sup>2</sup>, adolescent and young adult, age 18-30  
125 yrs, men, who are evening people.

**Intervention:** Subjects stay for each condition, for 3 circadian cycles (3 x 21 h or 3 x 27 h), in the absence of time cues, in a controlled situation under controlled energy balance conditions in a respiration-chamber.

130 **Main study parameters/endpoints:** energy expenditure and activity induced energy expenditure (AEE), substrate oxidation, sleep quality, as well as mood, feelings of hunger and satiety, food choice and energy intake, the rewarding value of food (wanting and liking), endocrinological aspects, and body temperature

135 **Nature and extent of burden:** This study does not include any major risks for the subjects. During the time-blinded period two researchers will always be present during the subjects stay in the respiration chamber. There are no risks for the subjects in using any of the meals because people with certain food allergies are excluded and all products are regular food items available at the local supermarket (AH). The “thermometer pill” that they have to swallow is completely harmless and runs through the digestive system, where it eventually will exit the body via the feces. Blood  
140 sampling in this study is limited and without side effects, apart from its usual risks of minor bruising. Urine sampling is done in urine bottles with 10 ml of diluted HCl, which might pose a risk for the subjects, however they will be carefully instructed on how to sample the urine and handle the urine bottles. The subject needs to follow the prescribed schedule on sleeping, filling in questionnaires and eating. The experiment  
145 will take about 144 hours of the subject’s time.

**Benefit:** This study does not have any benefits for the subjects themselves, but will give possible new knowledge for treatment of obesity.

**1. Introduction and rationale**

150 The prevalence of obesity has increased worldwide to epidemic proportions (1). In the  
period 1993 to 1997, 40.2% men and 25.0% women of the Dutch population (age 37-  
43y) were regarded as overweight (Body Mass Index: (BMI) 25-29.9 kg/m<sup>2</sup>), and  
8.5% men and 9.3% women were regarded as obese (BMI>30 kg/m<sup>2</sup>). This is  
155 considered as a major health problem, since obesity is associated with an increased  
risk for a number of serious diseases, such as coronary heart diseases, hypertension,  
non-insulin dependent diabetes, pulmonary dysfunction, and certain types of cancer  
(1). Developing strategies for weight loss as well as trying to reveal the causes of  
obesity is important, because even a modest weight loss (5-10% of initial body  
weight) markedly reduces the risk for mortality and morbidity.

160

Evidence from interventions to reduce body-weight is very limited (2, 3). Current  
strategies for weight reduction include dietetic interventions often combined with  
behaviour therapy, although the effect is controversial. Meta-analyses show that  
dietary treatment achieves only temporary and short-term weight loss (2, 3).

165

Multidisciplinary treatment programs report improvements in body composition,  
fitness and modest short-term weight loss. For long-term treatment success permanent  
lifestyle changes are necessary with regard to energy balance, food intake, implying  
physical activity patterns and behavior to emotional stress. Until now,  
recommendations for improving food choice, food intake patterns, and energy intake,  
170 as well as for normalizing physical activity, have not resulted in solutions for  
prevention and treatment of obesity. It may be that advices on the energy balance  
components energy intake and energy expenditure lack the interaction with the  
subjects' individual circadian alignment, or that circadian alignment is disturbed, due  
to environmental pressure.

175

Circadian rhythm is an essential component of energy homeostasis, as it represents an  
organism's ability to coordinate daily patterns in activity, feeding, energy utilization  
and energy storage across the daily 24-h cycle (4, 5). Recent studies in animals and  
humans have demonstrated that even mild disruptions of circadian regulation and  
180 sleep can have profound effects on metabolism regulation and obesity (6-8).

For example, the suprachiasmatic nucleus (SCN) of the hypothalamus has been studied, which is considered to be the master circadian clock that orchestrates and synchronizes behavioural and physiological rhythms under normal circumstances. 185 Metabolic processes are easily decoupled from the primarily light-driven SCN, when food intake is desynchronized from normal diurnal patterns of activity, thereby demonstrating that the circadian system is responsive to changes in energy supply and metabolic status (8). Furthermore, it has been shown that coupling of feeding 190 schedules with caloric restriction shifts behavioural and physiological circadian rhythms and gene expression in the SCN to meal-time in an advanced direction, probably due to increased hunger, whereas high-fat intake shifts circadian rhythms in a delayed direction with especially a high proportion of energy intake late in the evening (9). This close interaction is likely to be critical for normal circadian 195 regulation of metabolism, and may also, together with directly related possible sleep disturbance, underlie the disruption of proper metabolic rhythms observed in metabolic disorders, such as obesity and type-II diabetes

Until now, only one study has assessed the consequences of circadian misalignment in 200 humans. Scheer et al 2009 (10) subjected ten adults to a 10 day protocol, wherein subjects ate and slept at all phases of the circadian cycle-achieved by scheduling a recurring 28h day. Circadian misalignment, when subjects ate and slept approximately 12 h out of phase from their habitual times, systematically decreased leptin levels, and increased glucose concentrations despite increased insulin levels. It 205 also completely reversed the daily cortisol rhythm, increased mean arterial pressure, and reduced sleep efficiency. Notably, circadian misalignment caused 3 of 8 subjects (with sufficient available data) to exhibit postprandial glucose responses in the range typical of a prediabetic state. Circadian misalignment appeared to result in metabolic and cardiovascular changes as seen in obese subjects, and therefore present to be a 210 risk for overweight and obesity. The study by Scheer et al (10) only studied the metabolic and cardiovascular consequences, however circadian misalignment may also affect other parts of the energy balance, namely energy intake and energy expenditure (11). Both sides of the energy balance are regulated by the circadian rhythm (11). Circadian changes in energy expenditure have been shown in resting 215 metabolic rate, which is about 6% higher in the afternoon than in the morning (12).



Also, circadian changes in energy intake have been shown, as reverse feeding of nocturnal active animals during the light phase can result in increased weight gain (13). Therefore, the aim of the present study is first to determine the consequences of circadian misalignment for energy intake and energy expenditure, sleep quality, mood, feelings of hunger and satiety, food choice, and the reward system. We hypothesize that circadian misalignment may result in a disturbed energy balance, as a consequence of decreased energy expenditure and increased energy intake. Furthermore, it may alter substrate oxidation, decrease sleep quality, increase feelings of hunger and decrease feelings of satiety, alter food choice towards more high fat and sugary food, and alter the rewarding value of food towards higher wanting and decreased liking of foods. All these changes have previously been shown in obese subjects and therefore may illustrate a pre-obese state in the overweight subjects we will be studying, which when circadian misalignment is prolonged, may result in overweight and obesity.

230

**2. Primary objectives**

The primary objectives of the study are to assess the effect of circadian misalignment on:

- 235 - energy expenditure and activity induced energy expenditure (AEE)
- substrate oxidation
- sleep quality and sleep time
- mood, feelings of hunger and satiety
- food choice and energy intake
- 240 - the rewarding value of food (wanting and liking)
- relevant endocrinological parameters
- body temperature

### **3. Study design**

#### 245 *Study design*

Subjects will stay time blinded in the respiration chamber to measure energy intake and energy expenditure, as well as sleep quality, mood, feelings of hunger and satiety, food choice, and the reward system (14), during three light-entrained circadian cycles of a 1:2 ratio. A short cycle will be 21 hrs (7/14), a long cycle 27 hrs (9/18). In contrast to the study by Scheer et al. (10) in which a phase difference of 24 hours was induced, we will induce a maximal phase difference of 9 hours to minimize the duration of the experiment and the strain on the subjects. The chosen duration of 3 short or long circadian cycles is a compromise between a minimum duration in order to be able to obtain a clear result, and a maximum duration that still is bearable for the subjects. The chosen duration is also based upon experience with respiration chamber studies lasting for 84 h (15, 16). The total duration of the experiment is  $81 + 63 = 144$  h (6 days), with at least 1 month in between the long and/or short cycles, to avoid overlap and to make sure the subjects can get back to their regular circadian rhythm before they are subjected to the altered cycles. Light-entrainment will be achieved using day-light lamps during the waking hours and black curtains during the sleeping hours. During food-entrainment, light conditions will be dim light continuously, (about 1.8 lux) (10), to minimize any light-entrained influence on the circadian system. During their stay in the chamber, subjects will be fed in energy balance (17) in a food-entrained way, at time-points related to their cycle duration. EEG will be used to measure wake and sleep phases continuously, in order to determine sleep quality. Heart rate will be monitored using a ECG and body temperature (18) using a CorTemp™ Data Recorder (HQInc., Palmetto (FL), USA). Appetite and mood profiles will be measured hourly and before and after each meal, by anchored 100 mm visual analogue scales (19) and by POMS and STAI-state questionnaires (20, 21). Also, blood-parameters will be measured before and after a meal (6, 7). Finally, effects on food reward and energy intake will be measured by means of a validated wanting and liking computer-test (22), before and during the evening meal before subjects leave the chamber. This evening meal consists of subjects' food choice, and will be given *ad libitum*. Food choice, rewarding characteristics, macronutrient composition, energy-density, and energy content will be calculated.

The experimental design of the study is presented in **figure 1** by a raster plot.

Figure 1

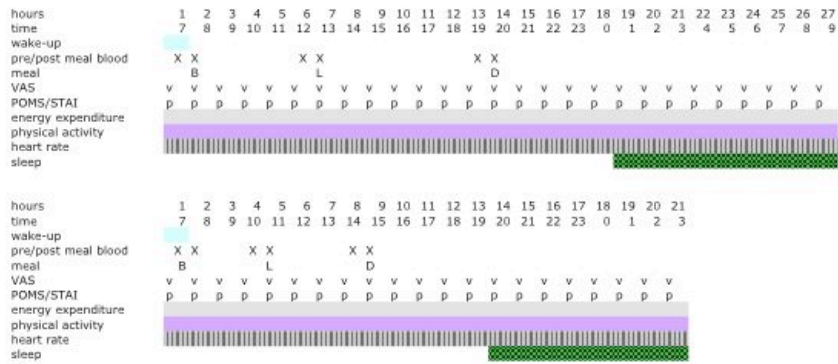

#### **4. Study population**

##### 280 *1. Population*

In total 16 male subjects from the student population will be recruited by means of advertisements on notice boards at Maastricht University. Men will be recruited as in women oral contraceptive usage and phase of the menstrual cycle have to be taken into account; in addition the expected differences are that large that we would require  
285 twice the number of subjects. We will recruit adolescent and young adult men (age 18-30 yrs), who are overweight (BMI 25-29 kg/m<sup>2</sup>), as they are thought to be susceptible for development of obesity. The men also have to be evening people, with a naturally long circadian cycle and with no sleep problems (such as insomnia, daytime hypersomnia, or repeated waking up during the night), which will be  
290 assessed using the validated Munich Chronotype Questionnaire (23). The subjects have to be in good health, non-smokers, not using medication, no food allergies, weight stable and at most moderate alcohol users. This will be evaluated using questionnaires on health, use of medication, smoking behaviour, food allergies and alcohol consumption. During screening body-weight, height, waist circumference,  
295 and hip circumference will be measured. No additional physical tests will be performed to evaluate the inclusion criteria; the investigator will evaluate reliability of the subject during the screening. Furthermore, habitual physical activity will be estimated with the Baecke questionnaire (24), which consists of three components: work activity, sports activity and leisure activity. The Dutch translation of the Three  
300 Factor Eating Questionnaire (TFEQ) (25) will be used to determine aspects of eating behaviour: cognitively dietary restraint; disinhibition/emotional eating; and general hunger. A list of food products that will be used during the experiment will be presented to the subject. If a subject does not like any of the items, they will be replaced, to eliminate the effect of food preferences on feelings of hunger and satiety.

305

##### *2. Inclusion criteria*

Subjects have to be in good health, weight stable, non-smokers, not using medication, not have any sleep problems, and at most moderate alcohol users. They have to be overweight, BMI 25-29 kg/m<sup>2</sup>, adolescent and young adult, age 18-30 yrs, men, who  
310 are evening people.

### 3. Exclusion criteria

Subjects will be excluded if they are not in good health, changed weight (3 kg) in the last 3 months, using medication, smokers, alcohol users and/or have sleep problems (such as insomnia, daytime hypersomnia or repeated waking up during the night). Also if their BMI is under 25 or over 29 kg/m<sup>2</sup>, or aged under 18 or over 30 yrs, or if they are morning people; the expected differences may be that large that we would require twice the number of subjects.

### 4. Sample size

The primary parameters/endpoints are the changes in the energy expenditure and energy intake. The study by Scheer et al. (10) did not study 24h energy expenditure or total energy intake. No other studies were found, observing the effect of circadian misalignment on 24 h energy expenditure or total energy intake. To do a sample size calculation a study on sleep deprivation was used. The study by Brondel et al. (26) showed an increase in energy intake after 4 h sleep compared to 8 h sleep in healthy young men (3037±853 vs. 2478±512 Kcal, p<0.01). With an  $\alpha$  of 0.05 and  $\beta$  of 0.10 (power=1- $\beta$ =0.90) the number of subjects needed is:

$$N=10 \times (SD)^2 / (\text{mean1} - \text{mean2})^2 + 0.96$$

$$N=10 \times (512)^2 / (3037 - 2478)^2 + 0.96$$

$$= 9 \text{ subjects needed}$$

Taking drop out and a smaller phase shift (1 night with 4 hours sleep deprivation compared to 3 days of 3 hour phase shift) into account, 16 subjects will be included in the experiment. 16 subjects will also be sufficient to be able to find significant differences in energy expenditure, appetite profiles and endocrinological parameters, based upon the studies by Lejeune et al. and Veldhorst et al (27, 28).

**5. Treatment of subjects**340 *1. Investigational product/treatment*

The aim of the present study is first to determine the consequences of circadian misalignment for energy intake and energy expenditure, as well as mood, feelings of hunger and satiety, food choice, and the rewarding value of food. Subjects stay for each condition, for 3 circadian cycles (3 x 21 h or 3 x 27 h), in the absence of time cues, in a controlled situation under controlled energy balance conditions in a respiration-chamber. A short cycle will be 21 hrs (7/14), which represents the cycle of morning people, and a long cycle will be 27 hrs (9/18), which represents the cycle of evening people. In order to identify effects of circadian misalignment, subjects undergo randomly the short or long circadian cycles.

350

## **7. Methods**

### *1. Study parameters/endpoints*

#### 1.1 Main study parameters/endpoints

- **energy expenditure**, which will be measured continuously during the 21h or 27h cycles via oxygen consumption and carbon dioxide production that will be measured in the respiration chamber. The concentrations of oxygen and carbon dioxide will be measured using a paramagnetic O<sub>2</sub> analyzer and an infrared CO<sub>2</sub> analyzer.
  - **food choice and energy intake**, which will be measured before and after dinner on the last day of the 3 circadian cycles via a wanting and liking test on a computer (22).
- 360 During the rest of the stay the subjects have to be fed in energy balance.

We hypothesize that circadian misalignment may result in a disturbed energy balance, as a consequence of decreased energy expenditure and increased energy intake, as it alters food choice towards more high fat and sugary food.

365

#### 1.2 Secondary study parameters/endpoints

- **activity induced energy expenditure (AEE)**, which will be measured continuously during the 21h or 27h cycles via a triaxial accelerometer (Tracmor, Maastricht, The Netherlands) on a belt.
  - **substrate oxidation**; carbohydrate, fat, and protein oxidation will be calculated using O<sub>2</sub> consumption and CO<sub>2</sub> production and urinary nitrogen excretion, with the formula of Brouwer (29). Urine will be collected every 21 h or 27h. Volume and nitrogen concentration will be measured, the latter using a nitrogen analyzer.
  - **sleep quality and sleep duration**, which will be measured continuously via EEG measurements. Sleep quality represents the amount of minutes in which the subject is either in sleep phase III, IV plus Rapid eye movement sleep (REM) divided by total duration of sleep. Sleep will be registered using 6 electrodes on the head to measure brain activity (EEG), 2 electrodes on the chin to measure muscle activity (EMG), 2 electrodes around the eyes to measure eye movement (EOG) and 2 electrodes on the chest to measure heart rate and cardiac function (ECG).
- 370
- 375
- 380



- **mood, feelings of hunger and satiety**, will be measured hourly and before and after each meal, by visual analogue scales (VAS) (19) and by Profile of Mood States (POMS) and State Trait Anxiety Index (STAI) questionnaires (20, 21).

385 - **the rewarding value of food (wanting and liking)**, will be measured before and after dinner on the last day of the 3 circadian cycles via a wanting and liking test on a computer (22).

390 - **endocrinological parameters**, will be measured before and after a meal via a catheter inserted into an ante-cubital vein of the contra-lateral arm. From the blood samples the following parameters will be determined melatonin, leptin, glucose, insulin, ghrelin, and GLP-1.

- **body temperature**, which will be measured continuously via a CorTemp™ Data Recorder (HQInc., Palmetto (FL), USA). Subjects will swallow a “thermometer pill” (CorTemp™ Ingestible Core Body Temperature Sensor) that wirelessly transmits core body temperature as it travels through the digestive tract.

395

We hypothesize that circadian misalignment may alter substrate oxidation, decrease sleep quality, increase feelings of hunger and decrease feelings of satiety, and alter the reward system towards higher wanting and decreased liking of foods. All these changes have previously been shown in obese subjects and therefore may illustrate a pre-obese state in the overweight subjects that we will study, which when circadian misalignment is prolonged, may result in overweight and obesity.

400

## *2. Randomisation, blinding and treatment allocation*

Partly randomized single-blinded cross-over design.

405

## *3. Study procedures*

### Energy expenditure and activity induced energy expenditure (AEE)

Oxygen consumption and carbon dioxide production will be measured in the respiration chamber (14). The respiration chamber is a 14 m<sup>3</sup> room, furnished with a bed, chair, computer, television, radio, dvd-player, telephone, intercom, sink and toilet. The room is ventilated with fresh air at a rate of 70-80 l/min. The ventilation rate is measured with a dry gas meter. The concentrations of oxygen and carbon dioxide will be measured using a paramagnetic O<sub>2</sub> analyzer and an infrared CO<sub>2</sub> analyzer. During each 15-min period six samples of outgoing air for each chamber,

410

415 and one sample of fresh air, zero gas, and calibration gas will be measured. The gas  
samples to be measured will be selected by a computer that also stores and processes  
the data (14).

21 h or 27h energy expenditure consists of sleeping metabolic rate (SMR), diet-  
420 induced energy expenditure (DEE), and AEE. 21 h or 27h energy expenditure and 21  
h or 27h respiratory quotient (RQ) will be calculated using the formula of Brouwer  
(29). Physical activity is monitored using a radar system working on the Doppler  
principle. The subjects wear a triaxial accelerometer (Tracmor, Maastricht, The  
Netherlands) on a belt during the entire stay in the chamber, to measure physical  
425 activity as well (30). SMR is defined as the lowest mean energy expenditure  
measured over three consecutive hours when the subject is asleep. DEE will be  
calculated by plotting energy expenditure against radar output, both averaged over 30-  
min periods (31). The intercept of the regression line at the lowest radar output  
represents the energy expenditure in the inactive state (Resting Metabolic Rate;  
430 RMR), consisting of SMR and DEE. DEE will be determined by subtracting SMR  
from RMR. Activity-induced energy expenditure will be determined by subtracting  
RMR from 21 h or 27h energy expenditure. The Physical Activity Level (PAL) will  
be calculated by dividing 21 h or 27h energy expenditure by SMR.

#### 435 Substrate oxidation

Carbohydrate, fat, and protein oxidation will be calculated using O<sub>2</sub> consumption and  
CO<sub>2</sub> production and urinary nitrogen excretion, with the formula of Brouwer (29).  
Urine will be collected every 21 h or 27h. Samples will be collected in containers  
with 10 ml diluted HCl to prevent nitrogen loss through evaporation. The subjects  
440 will be told, before entering the respiration chamber, to handle the urine containers  
with the most caution because of the presence of diluted HCl. The instruction on how  
to collect urine and handle the containers is attached to the protocol (**attachment 1**).  
Volume and nitrogen concentration will be measured, the latter using a nitrogen  
analyzer.

445

#### Sleep quality

To determine sleep duration and sleep quality continuously EEG measurements will  
take place. Sleep quality represents the amount of minutes in which the subject is

either in sleep phase III, IV plus Rapid eye movement sleep (REM) divided by total  
450 duration of sleep. Sleep will be registered using 6 electrodes on the head to measure  
brain activity (EEG), 2 electrodes on the chin to measure muscle activity (EMG), 2  
electrodes around the eyes to measure eye movement (EOG) and 2 electrodes on the  
chest to measure heart rate and cardiac function (ECG). The subject is only allowed to  
sleep on the times stated by the investigator, so daytime naps and sleeping in is not  
455 allowed, and will be controlled via the EEG measurements. To avoid problems  
regarding sleep no subjects will be included with known sleep problems (such as  
insomnia, daytime hypersomnia, or repeated waking up during the night). If the  
subject is not able to sleep at the times stated by the investigator, he has to lie in bed,  
with the lights off, and rest with his eyes closed. The subject is not allowed to perform  
460 other activities during the times he should be asleep. When the subject has not slept  
for at least 3 hours during the times stated by the investigator, the test will be  
terminated to reduce the strain for the subject.

#### Mood, feelings of hunger and satiety

465 Appetite and mood profiles will be measured hourly and before and after each meal,  
by visual analogue scales (VAS) (19) and by Profile of Mood States (POMS) and  
State Trait Anxiety Index (STAI) questionnaires (20, 21).

Aspects of appetite will be assessed using 100 mm VAS with questions about feelings  
of hunger, satiety, thirst, and desire to eat. Opposing extremes of each feeling are  
470 described at either end of the 100-mm horizontal line, and subjects mark the line to  
indicate how they feel at that moment.

The POMS questionnaire contains 70 adjectives that are rated on a five-point scale,  
anchored by “much like this” to “much unlike this” and is divided into five subscales  
(depression, tension, confusion, fatigue and anger), each scoring a maximum of 35.

475 An increase in POMS scores is associated with a worsening in mood, except in the  
case of “vigor”.

The STAI state questionnaire refers to the transitory emotional response involving  
unpleasant feelings of tension and apprehensive thoughts. The STAI scale is  
composed of 20 questions rated on a four-point scale, ranging from “much like this,”  
480 to “much unlike this” and requires that subjects describe how they feel generally, on  
the anxiety-trait scale, and how they feel at a specific moment, on the anxiety-state

scale. The questionnaire can score a maximum of 80 and an increase in STAI state scores is associated with an increase in anxiety.

485 Filling out the questionnaires will take about a minute per questionnaire, in total 3 minutes. Examples of the questionnaires are attached to the protocol.

#### Food choice and energy intake

Our subjects are in overall energy balance, as they are weight stable for at least 3 months and not currently on a diet. Also during their stay in the chamber, they will be  
490 fed in energy balance (17). Subjects will have their breakfast, lunch and dinner at set time points (**figure 1**). The energy content of the food will be calculated using the equation of Harris-Benedict that calculates Basal Metabolic Rate (BMR) (17). For the first day BMR will be multiplied by an activity index of 1.4. To determine the appropriate level of energy intake to attain energy balance in the respiration chamber,  
495 the sleeping metabolic rate (SMR) will be calculated during the first night and multiplied by an activity index of 1.4. The selected activity index is based on results of a study in which physical activity was determined in confined conditions (a respiration chamber) resulting in a mean PAL of 1.4 (calculated as 24-h energy expenditure/SMR) (32).

500

Energy intake will be divided over the meals as 20% for breakfast, 40% for lunch, and 40% for dinner. The macronutrient composition of the diet will be 12/55/33 En% (protein/carbohydrate/fat). Menus -including amount of food in grams- for two different men, who have a different age/weight/height are represented in **figure 2AB**.

505

The diet consists of normal food products, available in the Albert Hein supermarket. The food products will be bought by the investigators and immediately after purchase, transported by car to the university. Refrigerated products will be taken in Deepfreeze bags. After arrival at the university the refrigerated foods will be stored immediately at 4 C° fridge and the bread will be deep-frozen at -20 C° freezer of a research kitchen  
510 from the Department of Human Biology. Before preparation the expiration dates will be checked and the investigators will go to the store each week to get fresh products.

510

All foods will be prepared in a research kitchen from the Department of Human Biology by one of the researchers. Further information can be found in the guideline (**attachment 2**) 'MEC azM/Um for preparation, delivery and administration of  
515 products for human usage in clinical studies'.

515



**Figure 2A**

Relative energy intake for a male subject, aged 30y, height 1.80m, weight 77 kg, calculated using the equation of Harris-Benedict that calculates Basal Metabolic Rate.

520 BMR will be multiplied by an activity index of 1.4.

|                          |      |        |
|--------------------------|------|--------|
| Ontbijt                  | Gram |        |
| volkorenbrood            |      | 77.97  |
| pate                     |      | 13.60  |
| halva jam                |      | 22.27  |
| ontbijtkoek volkoren     |      | 27.84  |
| halvarine (40% vet)      |      | 5.57   |
| appel                    |      | 167.07 |
| sultana                  |      | 34.33  |
| Lunch                    |      |        |
| volkorenbrood            |      | 116.94 |
| halvarine                |      | 16.71  |
| gebraden gehakt          |      | 33.41  |
| pate                     |      | 13.59  |
| ontbijtkoek volkoren     |      | 31.71  |
| cup a soup               |      |        |
| champignon/ham           |      | 194.96 |
| halfvolle melk           |      | 111.40 |
| appel                    |      | 167.07 |
| sultana                  |      | 34.33  |
| Diner                    |      |        |
| kant-en-klaar boerenkool |      | 556.94 |
| rauwkost                 |      | 167.10 |
| honing/mosterd dressing  |      | 44.55  |
| sinaasappelsap           |      | 250.61 |

**Figure 2B**

Relative energy intake for a male subject, aged 25 y, height 1.77 m, weight 65 kg, calculated using the equation of Harris-Benedict that calculates Basal Metabolic Rate.

525 BMR will be multiplied by an activity index of 1.4.

|                          |      |        |
|--------------------------|------|--------|
| Ontbijt                  | gram |        |
| volkorenbrood            |      | 71.41  |
| pate                     |      | 12.45  |
| halva jam                |      | 20.40  |
| ontbijtkoek volkoren     |      | 25.50  |
| halvarine (40% vet)      |      | 5.10   |
| appel                    |      | 153.00 |
| sultana                  |      | 31.43  |
| Lunch                    |      |        |
| volkorenbrood            |      | 107.09 |
| halvarine                |      | 15.30  |
| gebraden gehakt          |      | 30.60  |
| pate                     |      | 12.44  |
| ontbijtkoek volkoren     |      | 29.04  |
| cup a soup               |      |        |
| champignon/ham           |      | 178.54 |
| halfvolle melk           |      | 102.02 |
| appel                    |      | 153.00 |
| sultana                  |      | 31.43  |
| Diner                    |      |        |
| kant-en-klaar boerenkool |      | 510.03 |
| rauwkost                 |      | 153.02 |
| honing/mosterd dressing  |      | 40.80  |
| sinaasappelsap           |      | 229.50 |

The rewarding value of food parameters: wanting and liking

To reveal whether circadian misalignment alters rewarding value of food parameters, the subjects have to play a wanting and liking test on a computer (22) before and after  
530 diner on the last day of the 3 circadian cycles. The computer test was developed to determine rewarding value, i.e. 'liking' and 'wanting', for 72 items divided in six categories (bread, filling, drinks, dessert, sweets, stationery). 'Liking' was measured by indicating relative preference of paired items (within/between categories), 'wanting' by working to earn items to choose from via a memory game in which the  
535 subjects show their preference for a certain food type. Completion of the liking and wanting parts will take about 30 minutes.

Endocrinological aspects

To investigate whether circadian misalignment affects the endocrinological  
540 parameters per cycle 6 blood samples (8.5 ml per sample) will be taken, via a catheter inserted into an ante-cubital vein of the contra-lateral arm. The samples will be drawn before and after the meals. From the blood samples the following parameters will be determined melatonin, leptin, glucose, insulin, ghrelin, and GLP-1. These parameters will be studied as their secretion is connected to the circadian rhythm, and we  
545 hypothesize that circadian misalignment will alter the concentrations of these parameters (10, 33-35). The amount blood necessary per sample per parameter is shown in **table 1**. The amounts stated are the minimal amounts of blood necessary to determine parameter concentrations through RIA analysis. The total amount drawn during the whole experiment will be 306 ml per subject.

550

555



**Table 1**

| <b>Hormone</b>    | Amount per sample (ml) |
|-------------------|------------------------|
| Melatonin         | 2                      |
| Leptin            | 0.5                    |
| Glucose           | 0.5                    |
| Insulin           | 0.5                    |
| Ghrelin           | 3                      |
| GLP-1             | 2                      |
| <b>Total (ml)</b> | 8.5                    |

Body temperature

560 The body temperature may influence quality and quantity of sleep (18). Whether there is a relation between body temperature and circadian misalignment, will be assessed with a CorTemp™ Data Recorder (HQInc., Palmetto (FL), USA). Subjects will swallow a “thermometer pill” (CorTemp™ Ingestible Core Body Temperature Sensor) that wirelessly transmits core body temperature as it travels through the digestive tract. The sensor’s signal passes harmlessly through the body to the CorTemp™ Data Recorder that is worn on the outside of the body.

565

*4. Withdrawal of individual subjects*

Subjects can leave the study at any time for any reason if they wish to do so without any consequences. The investigator can decide to withdraw a subject from the study for urgent medical reasons.

570

*5. Replacement of individual subjects after withdrawal*

If subjects leave the study, new subjects will replace them.

575

575 **8. Safety reporting***1. Section 10 WMO event*

In accordance to section 10, subsection 1, of the WMO, the investigator will inform the subjects and the reviewing accredited METC if anything occurs, on the basis of which it appears that the disadvantages of participation may be significantly greater  
580 than was foreseen in the research proposal. The study will be suspended pending further review by the accredited METC, except insofar as suspension would jeopardise the subjects' health. The investigator will take care that all subjects are kept informed.

585 *2. Adverse and serious adverse events*

Adverse events are defined as any undesirable experience occurring to a subject during the study, whether or not considered related to the experimental treatment. All adverse events reported spontaneously by the subject or observed by the investigator or his staff will be recorded. A serious adverse event is any untoward medical  
590 occurrence or effect that at any dose:

- results in death;
- is life threatening (at the time of the event);
- requires hospitalisation or prolongation of existing inpatients' hospitalisation;
- results in persistent or significant disability or incapacity;
- 595 - is a congenital anomaly or birth defect;
- is a new event of the trial likely to affect the safety of the subjects, such as an unexpected outcome of an adverse reaction, lack of efficacy of an IMP used for the treatment of a life threatening disease, major safety finding from a newly completed animal study, etc.

600

All SAEs will be reported through the accredited METC that approved the protocol, within 15 days after the sponsor has first knowledge of the serious adverse reactions.

SAEs that result in death or are life threatening should be reported expedited. The  
605 expedited reporting will occur not later than 7 days after the responsible investigator has first knowledge of the adverse reaction. This is for a preliminary

report with another 8 days for completion of the report.

*3. Follow-up of adverse events*

610 All adverse events will be followed until they have abated, or until a stable situation has been reached. Depending on the event, follow up may require additional tests or medical procedures as indicated, and/or referral to the general physician or a medical specialist.

**9. Statistical analysis**

- 615 Differences in energy intake and energy expenditure, as well as sleep quality, mood, feelings of hunger and satiety, food choice, and the rewarding value of food between treatments (21 h cycles and 27 h cycle), will be determined using unpaired t-tests. Differences over time and between treatments (21 h cycles and 27 h cycle) will be determined using two-factor ANOVA with repeated measures.
- 620 All statistical tests will be two-sided. Differences will be considered significant at  $p < 0.05$ , and values were expressed as mean  $\pm$  standard deviation.

625

630

## **10. Ethical considerations**

### *1. Regulation statement*

The study will be conducted according to the principles of the Declaration of Helsinki (9<sup>th</sup> version, October 2008, Seoul). Within this research the Dutch law for medical-  
635 scientific research with humans (WMO) is of application.

### *2. Recruitment and consent*

The subjects will be recruited via advertisements on the notice boards of Maastricht  
University. The subjects will receive a written subject-information and will be  
640 informed orally on the study by the investigator. A written informed consent will be  
obtained from all participants by the investigator. Subjects are allowed to think for  
one week after they have received the information, before they give approval for  
participation. They will be told that they can always stop without giving any reason.  
An independent medical doctor will be present for them to consult.

645

### *4. Benefits and risk assessment*

This study does not have any benefits for the subjects themselves, but will give  
possible new knowledge for treatment of obesity.

650 This study does not include any major risks for the subjects. The relatively extended  
stay in the respiration chamber (at least 63 h) might put a strain on the subjects,  
however the subjects have access to a computer, television, radio, dvd-player,  
telephone, intercom, sink and toilet, and are able to freely move around since there is  
no movement protocol. Windows are positioned in the door for contact with the  
655 researchers, in the wall for an outside view, and between the chambers for visual  
contact between the subjects. Curtains ensure privacy when needed. Safety  
precautions include a fire alarm and extinguisher, emergency power and lighting,  
subject registration on building fire-alert panel and short access to safe escape route.  
Subjects are also allowed to stop during the study and are able to open the doors to  
660 leave the respiration chamber from the inside, if necessary. During the time-blinded  
period two researchers will always be present during the subjects stay in the  
respiration chamber, to ensure the safety and wellbeing of the subjects There are no  
risks for the subjects in using any of the meals because people with certain food

allergies are excluded and all products are regular food items available at the local  
665 supermarket (AH). The “thermometer pill” that they have to swallow is completely  
harmless and runs through the digestive system, where it eventually will exit the body  
via the feces. Blood sampling in this study is limited and without side effects, apart  
from its usual risks of minor bruising. Urine sampling is done in urine bottles with 10  
670 ml of diluted HCl, which might pose a risk for the subjects, however they will be  
carefully instructed on how to sample the urine and handle the urine bottles. The  
subject needs to follow our schedule on sleeping, filling in questionnaires and eating,  
however, the majority of the time the subject is awake and he can fill in his own time.  
The experiment will cost about 144 hours of the subject’s time. Usually, this type of  
respiration chamber experiments are experienced as very comfortable by the subjects.  
675 They are looked after by friendly personnel, served all food prepared for them and  
experience a pleasant and quiet stay, enabling them to study, read, or work on the  
computer.

#### *5. Compensation for injury*

680 The investigator has a liability insurance, which is in accordance with article 7,  
subsection 6 of the WMO.

The sponsor (also) has an insurance, which is in accordance with the legal  
requirements in the Netherlands (Article 7 WMO and the Measure regarding  
685 Compulsory Insurance for Clinical Research in Humans of 23th June 2003). This  
insurance provides cover for damage to research subjects through injury or death  
caused by the study.

1. € 450.000,-- (i.e. four hundred and fifty thousand Euro) for death or injury  
for each subject who participates in the Research;
- 690 2. € 3.500.000,-- (i.e. three million five hundred thousand Euro) for death or  
injury for all subjects who participate in the Research;
3. € 5.000.000,-- (i.e. five million Euro) for the total damage incurred by the  
organisation for all damage disclosed by scientific research for the Sponsor  
as ‘verrichter’ in the meaning of said Act in each year of insurance  
695 coverage.

The insurance applies to the damage that becomes apparent during the study or within 4 years after the end of the study.

700 *6. Incentives*

For participation in this study subjects will receive financial compensation, 65 euro per 24 hours, which is 390 euro in total, as well as transportation fees.

## **11. Administrative aspects and publication**

### *1. Handling and storage of data and documents*

705 The privacy of the subjects is guaranteed, using subject numbers (for example nr 1) in combination with treatment code (A for 21h treatment and B for 27 h treatment) throughout the study. All subject-characteristics will thus be encoded and only the researcher and his supervisor have access to the code. Subjects can receive their personal results at the end of the study. The collected data will be saved for 15 years;  
710 this is the legal period for storage of human documents. All human materials will be removed after publication of the results.

### *2. Amendments*

Amendments are changes made to the research after a favourable opinion by the  
715 accredited METC has been given. All amendments will be notified to the METC that gave a favourable opinion.

### *3. Annual progress report*

The investigator will submit a summary of the progress of the trial to the accredited  
720 METC once a year. Information will be provided on the date of inclusion of the first subject, numbers of subjects included and numbers of subjects that have completed the trial, serious adverse events/ serious adverse reactions, other problems, and amendments.

### *4. End of study report*

The investigator will notify the accredited METC of the end of the study within a period of 8 weeks. The end of the study is defined as the last patient's last visit. In case the study is ended prematurely, the investigator will notify the accredited METC, including the reasons for the premature termination.  
730 Within one year after the end of the study, the investigator will submit a final study report with the results of the study, including any publications/abstracts of the study, to the accredited METC.

### *5. Public disclosure and publication policy*



735 The results will be published in the international peer reviewed literature. The CCMO Statement will be followed, which means that the results will be published within 3 months after analysis.

**12. References**

740

1. Haslam DW, James WP. Obesity. *Lancet* 2005;366:1197-209.
2. Collins CE, Warren J, Neve M, McCoy P, Stokes BJ. Measuring effectiveness of dietetic interventions in child obesity: a systematic review of randomized trials. *Arch Pediatr Adolesc Med* 2006;160:906-22.
- 745 3. Avenell A, Broom J, Brown TJ, et al. Systematic review of the long-term effects and economic consequences of treatments for obesity and implications for health improvement. *Health Technol Assess* 2004;8:iii-iv, 1-182.
4. Bechtold DA. Energy-responsive timekeeping. *J Genet* 2008;87:447-58.
- 750 5. Swaab DF, Van Someren EJ, Zhou JN, Hofman MA. Biological rhythms in the human life cycle and their relationship to functional changes in the suprachiasmatic nucleus. *Prog Brain Res* 1996;111:349-68.
6. Spiegel K, Leproult R, L'Hermite-Baleriaux M, Copinschi G, Penev PD, Van Cauter E. Leptin levels are dependent on sleep duration: relationships with sympathovagal balance, carbohydrate regulation, cortisol, and thyrotropin. *J Clin Endocrinol Metab* 2004;89:5762-71.
- 755 7. Spiegel K, Leproult R, Van Cauter E. Impact of sleep debt on metabolic and endocrine function. *Lancet* 1999;354:1435-9.
8. Mendoza J. Circadian clocks: setting time by food. *J Neuroendocrinol* 2007;19:127-37.
- 760 9. Eng S, Wagstaff DA, Kranz S. Eating late in the evening is associated with childhood obesity in some age groups but not in all children: the relationship between time of consumption and body weight status in U.S. children. *Int J Behav Nutr Phys Act* 2009;6:27.
- 765 10. Scheer FA, Hilton MF, Mantzoros CS, Shea SA. Adverse metabolic and cardiovascular consequences of circadian misalignment. *Proc Natl Acad Sci U S A* 2009;106:4453-8.
11. Ekmekcioglu C, Touitou Y. Chronobiological aspects of food intake and metabolism and their relevance on energy balance and weight regulation. *Obes Rev*.
- 770 12. Haugen HA, Melanson EL, Tran ZV, Kearney JT, Hill JO. Variability of measured resting metabolic rate. *Am J Clin Nutr* 2003;78:1141-5.
13. Arble DM, Bass J, Laposky AD, Vitaterna MH, Turek FW. Circadian timing of food intake contributes to weight gain. *Obesity (Silver Spring)* 2009;17:2100-2.
- 775 14. Schoffelen PF, Westerterp KR, Saris WH, Ten Hoor F. A dual-respiration chamber system with automated calibration. *J Appl Physiol* 1997;83:2064-72.
15. Wijers SL, Saris WH, van Marken Lichtenbelt WD. Cold-Induced Adaptive Thermogenesis in Lean and Obese. *Obesity (Silver Spring)*.

- 780 16. Wijers SL, Saris WH, van Marken Lichtenbelt WD. Individual thermogenic responses to mild cold and overfeeding are closely related. *J Clin Endocrinol Metab* 2007;92:4299-305.
17. Harris JA, Benedict FG. A Biometric Study of Human Basal Metabolism. *Proc Natl Acad Sci U S A* 1918;4:370-3.
- 785 18. Parmeggiani PL. Interaction between sleep and thermoregulation: an aspect of the control of behavioral states. *Sleep* 1987;10:426-35.
19. Kovacs EM, Lejeune MP, Westerterp-Plantenga MS. The effects of enterostatin intake on food intake and energy expenditure. *Br J Nutr* 2003;90:207-14.
- 790 20. Albrecht RR, Ewing SJ. Standardizing the administration of the Profile of Mood States (POMS): development of alternative word lists. *J Pers Assess* 1989;53:31-9.
21. Tenenbaum G, Furst D, Weingarten G. A statistical reevaluation of the STAI anxiety questionnaire. *J Clin Psychol* 1985;41:239-44.
- 795 22. Lemmens SG, Schoffelen PF, Wouters L, et al. Eating what you like induces a stronger decrease of 'wanting' to eat. *Physiol Behav* 2009;98:318-25.
23. Wittmann M, Dinich J, Merrow M, Roenneberg T. Social jetlag: misalignment of biological and social time. *Chronobiol Int* 2006;23:497-509.
24. Baecke JA, Burema J, Frijters JE. A short questionnaire for the measurement of habitual physical activity in epidemiological studies. *Am J Clin Nutr* 800 1982;36:936-42.
25. Stunkard AJ, Messick S. The three-factor eating questionnaire to measure dietary restraint, disinhibition and hunger. *J Psychosom Res* 1985;29:71-83.
26. Brondel L, Romer MA, Nougues PM, Touyarou P, Davenne D. Acute partial sleep deprivation increases food intake in healthy men. *Am J Clin Nutr* 805 27. Westerterp-Plantenga MS, Lejeune MP, Smeets AJ, Luscombe-Marsh ND. Sex differences in energy homeostasis following a diet relatively high in protein exchanged with carbohydrate, assessed in a respiration chamber in humans. *Physiol Behav* 2009;97:414-9.
- 810 28. Veldhorst MA, Westerterp-Plantenga MS, Westerterp KR. Gluconeogenesis and energy expenditure after a high-protein, carbohydrate-free diet. *Am J Clin Nutr* 2009;90:519-26.
29. Brouwer E. On simple formulae for calculating the heat expenditure and the quantities of carbohydrate and fat oxidized in metabolism of men and animals, from gaseous exchange (Oxygen intake and carbonic acid output) and urine-N. *Acta Physiol Pharmacol Neerl* 1957;6:795-802.
- 815 30. Levine J, Melanson EL, Westerterp KR, Hill JO. Tracmor system for measuring walking energy expenditure. *Eur J Clin Nutr* 2003;57:1176-80.
31. Westerterp KR, Wilson SA, Rolland V. Diet induced thermogenesis measured over 24h in a respiration chamber: effect of diet composition. *Int J Obes Relat Metab Disord* 1999;23:287-92.
- 820 32. Westerterp KR, Kester AD. Physical activity in confined conditions as an indicator of free-living physical activity. *Obes Res* 2003;11:865-8.
33. Benloucif S, Guico MJ, Reid KJ, Wolfe LF, L'Hermite-Baleriaux M, Zee PC. Stability of melatonin and temperature as circadian phase markers and their relation to sleep times in humans. *J Biol Rhythms* 2005;20:178-88.
- 825 34. Mingrone G, Nolfo G, Gissey GC, et al. Circadian rhythms of GIP and GLP1 in glucose-tolerant and in type 2 diabetic patients after biliopancreatic diversion. *Diabetologia* 2009;52:873-81.

- 830 35. Natalucci G, Riedl S, Gleiss A, Zidek T, Frisch H. Spontaneous 24-h ghrelin secretion pattern in fasting subjects: maintenance of a meal-related pattern. *Eur J Endocrinol* 2005;152:845-50.
